# Supplementary material for: Disparities in Metabolic Conditions and Cancer Characteristics among Hispanic Women with Breast Cancer: A Multi-Institutional Study
Source: MDPI journal article supplement (doi:10.3390/cancers14143411), 2022-07-14
Supplement: s1 [file s1]

Supplementary Table S1. Adjusted factors associated with Mexican Hispanics compared to Non-Mexican Hispanics

|                                                                        | OR*  | 95% CI |       | p-value |
|------------------------------------------------------------------------|------|--------|-------|---------|
| <b>Diabetes Mellitus</b>                                               | 3.45 | 2.02   | 5.88  | <0.001  |
| <b>Hypertension</b>                                                    | 0.79 | 0.51   | 1.21  | 0.281   |
| <b>Obesity</b>                                                         | 1.76 | 1.19   | 2.60  | 0.005   |
| <b>Dyslipidemia</b>                                                    | 0.18 | 0.11   | 0.27  | <0.001  |
| <b>Postmenopausal</b>                                                  | 1.84 | 1.23   | 2.77  | 0.003   |
| <b>Diagnosis-IDC (reference)</b>                                       |      |        |       |         |
| Lobular                                                                | 0.44 | 0.24   | 0.79  | 0.006   |
| Lobular and Ductal                                                     | 0.20 | 0.07   | 0.56  | 0.002   |
| Other                                                                  | 0.89 | 0.42   | 1.86  | 0.751   |
| <b>Stage-Early (reference)</b>                                         |      |        |       |         |
| Advanced                                                               | 1.45 | 0.90   | 2.34  | 0.124   |
| Unknown                                                                | 0.83 | 0.53   | 1.31  | 0.43    |
| <b>Surgery-None (reference)</b>                                        |      |        |       |         |
| Lumpectomy                                                             | 5.47 | 2.94   | 10.20 | <0.001  |
| Mastectomy                                                             | 2.39 | 1.34   | 4.27  | 0.003   |
| Unknown                                                                | 0.20 | 0.05   | 0.85  | 0.029   |
| * OR Odds ratio, CI confidence interval; IDC invasive ductal carcinoma |      |        |       |         |

**Supplementary Table S2. Distribution of patient characteristics between Mexicans compared to non-Mexicans among premenopausal women**

|                                | Ethnicity   |              |                  |
|--------------------------------|-------------|--------------|------------------|
|                                | Mexicans    | Non-Mexicans | p-value          |
| <b>Demographics</b>            |             |              |                  |
| N                              | 280         | 65           |                  |
| Age (mean (SD))                | 42.9 (5.1)  | 44.2 (4.9)   | <b>0.057</b>     |
| BMI, (mean (SD))               | 30.0 (6.0)  | 28.0 (5.7)   | <b>0.018</b>     |
| <b>Diagnoses</b>               |             |              | <b>0.002</b>     |
| Ductal                         | 255 (91.1%) | 49 (75.4%)   |                  |
| Lobular                        | 13 (4.6%)   | 6 (9.2%)     |                  |
| Ductal and Lobular (mixed)     | 2 (0.7%)    | 3 (4.6%)     |                  |
| Other                          | 10 (3.6%)   | 7 (10.8%)    |                  |
| <b>Tumor Characteristics</b>   |             |              |                  |
| <b>Stage of tumor</b>          |             |              | <b>0.11</b>      |
| Stage I/II (early)             | 132 (47.1%) | 30 (46.2%)   |                  |
| Stage III/IV (adavnced)        | 88 (31.4%)  | 14 (21.5%)   |                  |
| Unknown                        | 60 (21.4%)  | 21 (32.3%)   |                  |
| <b>Type of surgery</b>         |             |              | <b>&lt;0.001</b> |
| None                           | 15 (5.4%)   | 8 (12.3%)    |                  |
| Lumpectomy                     | 142 (51.1%) | 26 (40.0%)   |                  |
| Mastectomy                     | 121 (43.5%) | 28 (43.1%)   |                  |
| Unknown                        | 0 (0.0%)    | 3 (4.6%)     |                  |
| <b>Receptor subtype</b>        |             |              |                  |
| Estrogen receptor              | 175 (63.9%) | 57 (87.7%)   | <b>&lt;0.001</b> |
| Progesterone receptor          | 157 (57.5%) | 50 (76.9%)   | <b>0.004</b>     |
| HER2 receptor                  | 49 (20.4%)  | 13 (20.0%)   | <b>0.94</b>      |
| Hormonal receptor              | 180 (64.3%) | 57 (87.7%)   | <b>&lt;0.001</b> |
| Triple-Negative Breast Cancer  | 65 (27.2%)  | 8 (12.3%)    | <b>0.013</b>     |
| <b>Comorbidities</b>           |             |              |                  |
| Diabetes Mellitus              | 37 (13.2%)  | 8 (12.3%)    | <b>0.84</b>      |
| Hypertension                   | 58 (20.7%)  | 16 (24.6%)   | <b>0.49</b>      |
| Dyslipidemia                   | 35 (12.5%)  | 22 (33.8%)   | <b>&lt;0.001</b> |
| Obesity                        | 125 (44.6%) | 24 (36.9%)   | <b>0.26</b>      |
| Coronary artery disease        | 3 (1.1%)    | 0 (0.0%)     | <b>0.40</b>      |
| Metabolic abnormalities        | 17 (6.1%)   | 9 (13.8%)    | <b>0.032</b>     |
| Any comorbidities              | 168 (60.0%) | 40 (61.5%)   | <b>0.82</b>      |
| <b>Number of comorbidities</b> |             |              | <b>0.20</b>      |
| 0                              | 112 (40.0%) | 25 (38.5%)   |                  |
| 1                              | 107 (38.2%) | 22 (33.8%)   |                  |
| 2                              | 44 (15.7%)  | 9 (13.8%)    |                  |
| 3                              | 8 (2.9%)    | 6 (9.2%)     |                  |
| 4                              | 9 (3.2%)    | 3 (4.6%)     |                  |

SD standard devaition, HER2 human epidermal receptor 2 neu

Supplementary Table S3. Distribution of patient characteristics by Hispanic origin.

|                                | Mexican     | Puerto Rican | Cuban       | South/<br>Central<br>American | Spanish NOS/<br>Hispanic NOS | Dominican<br>Republic | p-value           |
|--------------------------------|-------------|--------------|-------------|-------------------------------|------------------------------|-----------------------|-------------------|
| <b>Demographics</b>            |             |              |             |                               |                              |                       |                   |
| N                              | 851         | 5            | 11          | 21                            | 129                          | 3                     |                   |
| Age (mean (SD))                | 56.1 (11.9) | 47.2 (5.5)   | 55.6 (15.3) | 57.9 (10.0)                   | 55.4 (11.8)                  | 64.3 (11.2)           | <b>0.40</b>       |
| BMI (mean (SD))                | 30.9 (6.2)  | 34.0 (2.5)   | 27.3 (6.4)  | 26.4 (4.8)                    | 28.1 (5.9)                   | 25.3 (0.6)            | <b>&lt; 0.001</b> |
| Premenopausal women            | 280 (32.9%) | 4 (80.0%)    | 4 (36.4%)   | 7 (33.3%)                     | 50 (38.8%)                   | 0 (0.0%)              | <b>0.15</b>       |
| <b>Tumor characteristics</b>   |             |              |             |                               |                              |                       |                   |
| <b>Diagnoses</b>               |             |              |             |                               |                              |                       | <b>&lt; 0.001</b> |
| Ductal                         | 734 (86.6%) | 3 (60.0%)    | 9 (81.8%)   | 17 (81.0%)                    | 93 (72.1%)                   | 2 (66.7%)             |                   |
| Lobular                        | 53 (6.3%)   | 0 (0.0%)     | 2 (18.2%)   | 2 (9.5%)                      | 18 (14.0%)                   | 1 (33.3%)             |                   |
| Ductal and Lobular             | 9 (1.1%)    | 0 (0.0%)     | 0 (0.0%)    | 2 (9.5%)                      | 9 (7.0%)                     | 0 (0.0%)              |                   |
| Other                          | 52 (6.1%)   | 2 (40.0%)    | 0 (0.0%)    | 0 (0.0%)                      | 9 (7.0%)                     | 0 (0.0%)              |                   |
| <b>Stage of tumor</b>          |             |              |             |                               |                              |                       | <b>0.44</b>       |
| Stage I/II                     | 420 (49.4%) | 2 (40.0%)    | 5 (45.5%)   | 7 (33.3%)                     | 61 (47.3%)                   | 2 (66.7%)             |                   |
| Stage III/IV                   | 236 (27.7%) | 1 (20.0%)    | 2 (18.2%)   | 4 (19.0%)                     | 35 (27.1%)                   | 0 (0.0%)              |                   |
| Unknown                        | 195 (22.9%) | 2 (40.0%)    | 4 (36.4%)   | 10 (47.6%)                    | 33 (25.6%)                   | 1 (33.3%)             |                   |
| <b>Type of surgery</b>         |             |              |             |                               |                              |                       | <b>&lt; 0.001</b> |
| None                           | 62 (7.4%)   | 2 (40.0%)    | 2 (18.2%)   | 2 (9.5%)                      | 24 (18.6%)                   | 0 (0.0%)              |                   |
| Lumpectomy                     | 455 (54.0%) | 2 (40.0%)    | 6 (54.5%)   | 8 (38.1%)                     | 37 (28.7%)                   | 1 (33.3%)             |                   |
| Mastectomy                     | 321 (38.1%) | 1 (20.0%)    | 2 (18.2%)   | 11 (52.4%)                    | 63 (48.8%)                   | 2 (66.7%)             |                   |
| Unknown                        | 4 (0.5%)    | 0 (0.0%)     | 1 (9.1%)    | 0 (0.0%)                      | 5 (3.9%)                     | 0 (0.0%)              |                   |
| <b>Receptor subtype</b>        |             |              |             |                               |                              |                       |                   |
| ER+                            | 567 (68.6%) | 5 (100.0%)   | 7 (63.6%)   | 18 (85.7%)                    | 98 (76.0%)                   | 1 (33.3%)             | <b>0.084</b>      |
| PR+                            | 482 (58.4%) | 4 (80.0%)    | 7 (63.6%)   | 15 (71.4%)                    | 80 (62.0%)                   | 1 (33.3%)             | <b>0.58</b>       |
| HER2+                          | 129 (18.1%) | 0 (0.0%)     | 1 (9.1%)    | 1 (4.8%)                      | 28 (21.7%)                   | 1 (33.3%)             | <b>0.33</b>       |
| HR+                            | 578 (67.9%) | 5 (100.0%)   | 7 (63.6%)   | 18 (85.7%)                    | 98 (76.0%)                   | 1 (33.3%)             | <b>0.067</b>      |
| TNBC                           | 158 (22.2%) | 0 (0.0%)     | 4 (36.4%)   | 3 (14.3%)                     | 26 (20.2%)                   | 1 (33.3%)             | <b>0.55</b>       |
| <b>Comorbidities</b>           |             |              |             |                               |                              |                       |                   |
| Diabetes Mellitus              | 237 (27.8%) | 1 (20.0%)    | 2 (18.2%)   | 2 (9.5%)                      | 19 (14.7%)                   | 0 (0.0%)              | <b>0.012</b>      |
| Hypertension                   | 322 (37.8%) | 2 (40.0%)    | 5 (45.5%)   | 10 (47.6%)                    | 58 (45.0%)                   | 1 (33.3%)             | <b>0.65</b>       |
| Hyperlipidemia                 | 212 (24.9%) | 4 (80.0%)    | 6 (54.5%)   | 13 (61.9%)                    | 60 (46.5%)                   | 3 (100.0%)            | <b>&lt; 0.001</b> |
| Obesity                        | 434 (51.0%) | 5 (100.0%)   | 2 (18.2%)   | 5 (23.8%)                     | 43 (33.3%)                   | 0 (0.0%)              | <b>&lt; 0.001</b> |
| Coronary Artery Disease        | 36 (4.2%)   | 0 (0.0%)     | 1 (9.1%)    | 1 (4.8%)                      | 5 (3.9%)                     | 0 (0.0%)              | <b>0.96</b>       |
| Metabolic abnormalities        | 184 (21.6%) | 2 (40.0%)    | 2 (18.2%)   | 4 (19.0%)                     | 20 (15.5%)                   | 0 (0.0%)              | <b>0.47</b>       |
| Any comorbidities              | 614 (72.2%) | 5 (100.0%)   | 8 (72.7%)   | 16 (76.2%)                    | 96 (74.4%)                   | 3 (100.0%)            | <b>0.63</b>       |
| <b>Number of comorbidities</b> |             |              |             |                               |                              |                       | <b>0.76</b>       |
| 0                              | 237 (27.8%) | 0 (0.0%)     | 3 (27.3%)   | 5 (23.8%)                     | 33 (25.6%)                   | 0 (0.0%)              |                   |
| 1                              | 271 (31.8%) | 1 (20.0%)    | 4 (36.4%)   | 7 (33.3%)                     | 39 (30.2%)                   | 2 (66.7%)             |                   |
| 2                              | 159 (18.7%) | 2 (40.0%)    | 2 (18.2%)   | 5 (23.8%)                     | 37 (28.7%)                   | 1 (33.3%)             |                   |
| 3                              | 120 (14.1%) | 1 (20.0%)    | 1 (9.1%)    | 3 (14.3%)                     | 13 (10.1%)                   | 0 (0.0%)              |                   |
| 4                              | 64 (7.5%)   | 1 (20.0%)    | 1 (9.1%)    | 1 (4.8%)                      | 7 (5.4%)                     | 0 (0.0%)              |                   |

ER Estrogen Receptor, PR Progesterone receptor, HR Hormone Receptor, TNBC Triple-Negative Breast Cancer, HER2 human epidermal receptor 2 neu, SD standard deviation, NOS Not Otherwise Specified

|                                  | ER+*        |        |      |         | PR+*         |        |      |         |
|----------------------------------|-------------|--------|------|---------|--------------|--------|------|---------|
|                                  | PR**        | 95% CI |      | p-value | PR**         | 95% CI |      | p-value |
| <b>Non-Mexican</b>               | 1.37        | 1.18   | 1.59 | <0.001  | 1.38         | 1.14   | 1.67 | 0.001   |
| <b>Diabetes Mellitus</b>         | 1.2         | 1      | 1.45 | 0.052   | 1.04         | 0.8    | 1.35 | 0.764   |
| <b>Hypertension</b>              | 1.14        | 0.97   | 1.33 | 0.111   | 1.18         | 0.99   | 1.41 | 0.067   |
| <b>Obesity</b>                   | 1.05        | 0.9    | 1.21 | 0.542   | 0.99         | 0.84   | 1.18 | 0.938   |
| <b>Dyslipidemia</b>              | 0.86        | 0.7    | 1.06 | 0.168   | 0.85         | 0.67   | 1.09 | 0.198   |
| <b>Diagnosis-IDC (reference)</b> |             |        |      |         |              |        |      |         |
| Lobular                          | 1.37        | 1.14   | 1.65 | 0.001   | 1.47         | 1.19   | 1.81 | <0.001  |
| Lobular and Ductal               | 1.29        | 1.13   | 1.47 | <0.001  | 1.4          | 1.16   | 1.69 | <0.001  |
| Other                            | 0.89        | 0.59   | 1.35 | 0.594   | 0.57         | 0.28   | 1.18 | 0.129   |
| <b>Stage-Early (reference)</b>   |             |        |      |         |              |        |      |         |
| Advanced stage                   | 0.93        | 0.77   | 1.13 | 0.465   | 0.91         | 0.74   | 1.13 | 0.406   |
| Stage Unknown                    | 1.1         | 0.93   | 1.28 | 0.26    | 0.98         | 0.8    | 1.19 | 0.825   |
| <b>Surgery-None (reference)</b>  |             |        |      |         |              |        |      |         |
| Lumpectomy                       | 1.2         | 0.85   | 1.69 | 0.291   | 1.63         | 0.96   | 2.75 | 0.068   |
| Mastectomy                       | 1.15        | 0.82   | 1.6  | 0.429   | 1.55         | 0.92   | 2.61 | 0.097   |
| Unknown                          | 1.37        | 0.96   | 1.95 | 0.081   | 1.85         | 1.08   | 3.16 | 0.025   |
|                                  | <b>HR+*</b> |        |      |         | <b>TNBC*</b> |        |      |         |
| <b>Non-Mexicans</b>              | 1.39        | 1.2    | 1.61 | <0.001  | 0.43         | 0.21   | 0.87 | 0.019   |
| <b>Diabetes Mellitus</b>         | 1.14        | 0.94   | 1.38 | 0.172   | 0.72         | 0.35   | 1.47 | 0.368   |
| <b>Hypertension</b>              | 1.21        | 1.04   | 1.4  | 0.013   | 0.66         | 0.37   | 1.18 | 0.159   |
| <b>Obesity</b>                   | 1.02        | 0.89   | 1.18 | 0.742   | 1.25         | 0.82   | 1.91 | 0.303   |
| <b>Dyslipidemia</b>              | 0.86        | 0.7    | 1.06 | 0.155   | 1.55         | 0.91   | 2.64 | 0.109   |
| <b>Diagnosis-IDC (reference)</b> |             |        |      |         |              |        |      |         |
| Lobular                          | 1.37        | 1.15   | 1.64 | <0.001  | 1.54         | 0.65   | 3.65 | 0.328   |
| Lobular and Ductal               | 1.26        | 1.09   | 1.46 | 0.002   |              |        |      |         |
| Other                            | 0.77        | 0.49   | 1.19 | 0.234   |              |        |      |         |
| <b>Stage-Early (reference)</b>   |             |        |      |         |              |        |      |         |
| Advanced                         | 0.96        | 0.8    | 1.15 | 0.671   | 0.89         | 0.57   | 1.41 | 0.624   |
| Unknown                          | 1.04        | 0.89   | 1.22 | 0.618   | 1.03         | 0.61   | 1.73 | 0.913   |
| <b>Surgery-None (reference)</b>  |             |        |      |         |              |        |      |         |
| Lumpectomy                       | 1.2         | 0.85   | 1.7  | 0.292   | 0.45         | 0.23   | 0.89 | 0.021   |
| Mastectomy                       | 1.11        | 0.79   | 1.56 | 0.534   | 0.55         | 0.29   | 1.05 | 0.069   |
| Unknown                          | 1.29        | 0.9    | 1.84 | 0.169   |              |        |      |         |

\* ER Estrogen Receptor, PR Progesterone receptor, HR Hormone Receptor, TNBC Triple Negative Breast Cancer; CI: confidence interval, CI confidence interval, IDC invasive ductal carcinoma,\*\* PR Prevalence ratio

**Supplementary Table S5. Association of metabolic syndrome with tumor subtypes by Hispanic subgroups.**

| <b>ER*</b>         | <b>Mexican Hispanics</b> |              |      |                | <b>Non-Mexican Hispanics</b> |              |      |                |
|--------------------|--------------------------|--------------|------|----------------|------------------------------|--------------|------|----------------|
|                    | <b>PR**</b>              | <b>95%CI</b> |      | <b>p-value</b> | <b>PR**</b>                  | <b>95%CI</b> |      | <b>p-value</b> |
| Metabolic syndrome | 1.12                     | 1.02         | 1.24 | 0.023          | 1.13                         | 0.91         | 1.40 | 0.28           |
| Postmenopausal     | 1.05                     | 0.94         | 1.17 | 0.385          | 0.77                         | 0.66         | 0.90 | 0.001          |
| Lobular            | 1.45                     | 1.34         | 1.57 | 0              | 1.08                         | 0.85         | 1.37 | 0.536          |
| Mixed              | 1.10                     | 0.76         | 1.61 | 0.608          | 1.11                         | 0.82         | 1.50 | 0.489          |
| Unknown            | 1.09                     | 0.90         | 1.32 | 0.376          | 1.00                         | 0.72         | 1.39 | 0.999          |
| Advanced stage     | 0.85                     | 0.74         | 0.97 | 0.016          | 0.93                         | 0.76         | 1.13 | 0.439          |
| Unknown            | 1.06                     | 0.96         | 1.18 | 0.246          | 0.86                         | 0.70         | 1.06 | 0.159          |
| Lumpectomy         | 1.15                     | 0.93         | 1.44 | 0.203          | 0.99                         | 0.75         | 1.31 | 0.948          |
| Mastectomy         | 1.04                     | 0.84         | 1.31 | 0.7            | 1.10                         | 0.85         | 1.41 | 0.479          |
| Unknown            | 1.12                     | 0.48         | 2.64 | 0.793          | 0.89                         | 0.51         | 1.56 | 0.694          |
| <b>PR*</b>         | <b>Mexican Hispanics</b> |              |      |                | <b>Non-Mexican Hispanics</b> |              |      |                |
| Metabolic syndrome | 1.21                     | 1.06         | 1.37 | 0.004          | 1.21                         | 0.92         | 1.60 | 0.174          |
| Postmenopausal     | 0.94                     | 0.83         | 1.07 | 0.378          | 0.69                         | 0.55         | 0.86 | 0.001          |
| Lobular            | 1.50                     | 1.31         | 1.73 | 0              | 0.99                         | 0.69         | 1.41 | 0.957          |
| Mixed              | 1.31                     | 0.90         | 1.90 | 0.156          | 1.03                         | 0.66         | 1.62 | 0.89           |
| Unknown            | 1.13                     | 0.89         | 1.43 | 0.317          | 0.77                         | 0.41         | 1.46 | 0.426          |
| Advanced stage     | 0.85                     | 0.73         | 0.99 | 0.042          | 0.96                         | 0.72         | 1.27 | 0.776          |
| Unknown            | 1.02                     | 0.89         | 1.17 | 0.747          | 0.92                         | 0.70         | 1.20 | 0.538          |
| Lumpectomy         | 1.12                     | 0.86         | 1.46 | 0.389          | 1.01                         | 0.67         | 1.54 | 0.952          |
| Mastectomy         | 1.03                     | 0.79         | 1.34 | 0.823          | 1.21                         | 0.83         | 1.76 | 0.312          |
| Unknown            | 1.37                     | 0.57         | 3.29 | 0.482          | 1.12                         | 0.61         | 2.08 | 0.711          |
| <b>HR*</b>         | <b>Mexican Hispanics</b> |              |      |                | <b>Non-Mexican Hispanics</b> |              |      |                |
| Metabolic syndrome | 1.13                     | 1.02         | 1.25 | 0.02           | 1.13                         | 0.91         | 1.40 | 0.28           |
| Postmenopausal     | 1.03                     | 0.93         | 1.15 | 0.535          | 0.77                         | 0.66         | 0.90 | 0.001          |
| Lobular            | 1.38                     | 1.25         | 1.52 | 0              | 1.08                         | 0.85         | 1.37 | 0.536          |
| Mixed              | 0.99                     | 0.63         | 1.54 | 0.951          | 1.11                         | 0.82         | 1.50 | 0.489          |
| Unknown            | 0.97                     | 0.78         | 1.19 | 0.745          | 1.00                         | 0.72         | 1.39 | 0.999          |
| Advanced stage     | 0.86                     | 0.76         | 0.98 | 0.028          | 0.93                         | 0.76         | 1.13 | 0.439          |
| Unknown            | 1.02                     | 0.92         | 1.14 | 0.668          | 0.86                         | 0.70         | 1.06 | 0.159          |
| Lumpectomy         | 1.10                     | 0.89         | 1.36 | 0.382          | 0.99                         | 0.75         | 1.31 | 0.948          |
| Mastectomy         | 1.00                     | 0.81         | 1.23 | 0.977          | 1.10                         | 0.85         | 1.41 | 0.479          |
| Unknown            | 0.84                     | 0.31         | 2.25 | 0.722          | 0.89                         | 0.51         | 1.56 | 0.694          |
| <b>TNBC*</b>       | <b>Mexican Hispanics</b> |              |      |                | <b>Non-Mexican Hispanics</b> |              |      |                |
| Metabolic syndrome | 0.93                     | 0.64         | 1.35 | 0.693          | 0.79                         | 0.33         | 1.94 | 0.611          |
| Postmenopausal     | 0.75                     | 0.56         | 1.00 | 0.054          | 2.17                         | 1.07         | 4.39 | 0.031          |
| Lobular            | 0.09                     | 0.01         | 0.65 | 0.017          | 0.79                         | 0.33         | 1.89 | 0.596          |
| Mixed              | 0.75                     | 0.13         | 4.47 | 0.756          | 0.95                         | 0.24         | 3.79 | 0.946          |
| Unknown            | 0.81                     | 0.44         | 1.52 | 0.519          | 1.05                         | 0.25         | 4.46 | 0.947          |

[illegible]
